# Supplementary material
Source: PubMed Central journal article supplement (PMC4198384)

## **Appendix**

**Supplemental figure 1** Specific preabsorption of antibodies against FSPs. Representative serum reactive against TGFB $\beta$ 2(-1) and TGFB $\beta$ 2(-1)-C (A) and against TAF1B(-1) (B). ELISA results with different peptides as target antigens (A1-4; B1-3) after preincubation (blocking) of serum with different peptides at different concentrations (1-100  $\mu$ g/ml). Preincubation of serum with TGFB $\beta$ 2(-1) and TGFB $\beta$ 2(-1)-C (A1, A3) and TAF1B(-1) (B1), decreases reactivity against the respective peptides while preincubation with other peptides does not show an effect.

A

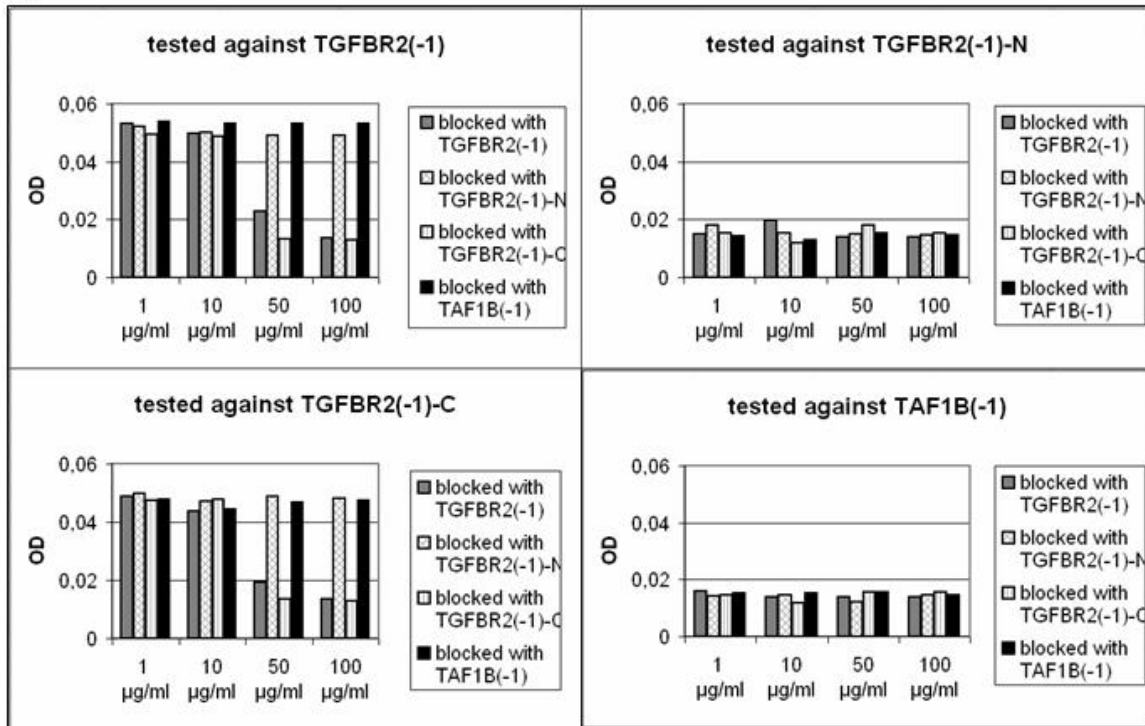

B

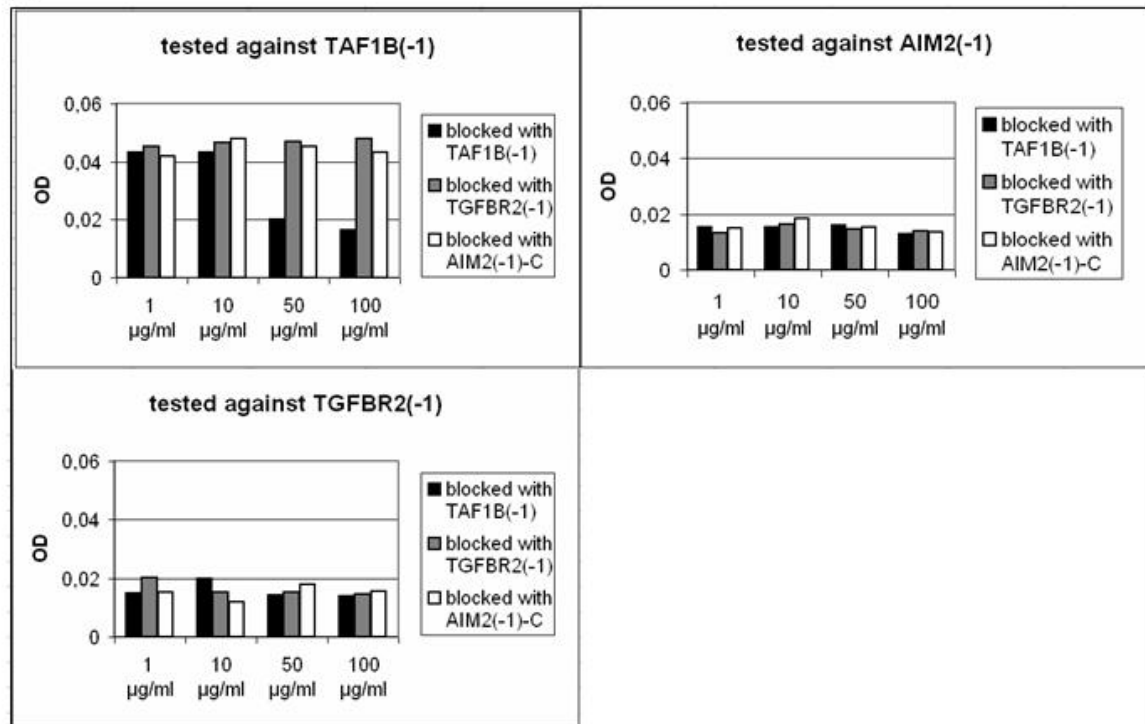

Supplement: NIHMS619306-supplement-01.pdf [file NIHMS619306-supplement-01.pdf]
